# Supplementary material for: Alkyl modification to optimize the ferroelastic properties of molecular crystals
Source: Royal Society of Chemistry journal article supplement (doi:10.1039/d4tc02784a), 2024-01-01
Supplement: d4tc02784a1.pdf [file d4tc02784a1.pdf]

## Alkyl modification to optimize the ferroelastic properties in molecular crystals

Zhi-Long Li<sup>a</sup>, Ming Zhu<sup>b</sup>, Feng-Wen Zhang<sup>b</sup>, Kun Ding<sup>a</sup>, Hao-Fei Ni<sup>b</sup>, Meng-Meng Lun<sup>\*a</sup>, Yi Zhang<sup>\*b</sup>,

Da-Wei Fu<sup>\*b</sup>

<sup>a</sup> Ordered Matter Science Research Center, Jiangsu Key Laboratory for Science and Applications of Molecular Ferroelectrics, Southeast University, Nanjing, 211189, People's Republic of China. Email: 230208797@seu.edu.cn, dawei@zjnu.edu.cn

<sup>b</sup> Institute for Science and Applications of Molecular Ferroelectrics, Key Laboratory of the Ministry of Education for Advanced Catalysis Materials, Zhejiang Normal University, Jinhua, 321019, People's Republic of China.

### Experimental Measurement Methods

#### Single-crystal X-ray diffraction.

Single crystal X-ray diffraction data for (DMP)PbBr<sub>3</sub> (DMP=*N,N*-dimethyl-3-pyrroline) (compound **1**) and (EMP)PbBr<sub>3</sub> (EMP=*N*-ethyl-*N*-methyl-3-pyrroline) (compound **2**) were obtained using a Rigaku Saturn 724 diffractometer using Mo-K $\alpha$  Radiation ( $\lambda = 0.71073 \text{ \AA}$ ). The refinement of the structure factor was achieved by the method of least squares on SHELXT and OLEX2 software packages.

#### Differential Scanning Calorimetry (DSC).

DSC measurement was performed on powder sample of two compounds by a NETZSCH-214 instrument. The sample was placed in aluminum crucible under nitrogen at atmospheric pressure. The experiment was conducted under nitrogen and atmospheric pressure, with heating and cooling rates of  $20 \text{ K} \cdot \text{min}^{-1}$ .

#### Dielectric Measurements.

The temperature-dependent dielectric permittivity  $\epsilon$  ( $\epsilon = \epsilon' - \epsilon''$ , where  $\epsilon'$  is the real part, and  $\epsilon''$  is the imaginary part) of these four compounds was performed through a Tonghui TH2828A Precision LCR meter with an AC voltage of 1 V. The powder is pressed into thin sheets, and the copper wire and sample are made into electrodes using silver glue. then, measure the dielectric constant of the sample at different temperatures and frequencies using the TH2828A instrument.

#### Thin-Film Preparation

The precursor solution of two compounds were prepared respectively by dissolving 20 mg of the as-grown crystals in 0.5 mL of HBr aqueous solution (40% in water). Then, 20  $\mu\text{L}$  of precursor solution was dropped and spread on a clean indium-doped tin oxide (ITO) glass substrate ( $1 \times 1 \text{ cm}$ ). The thin film of two compounds obtained after annealing at 328 K for 30 min.

#### Powder X-ray diffraction.

Powder X-ray diffraction (PXRD) measurements were performed at room temperature on a Rigaku D/MAX 2000 PC X-ray diffractometer. The diffraction pattern was recorded at  $2\theta$  between

5-50° within the range, the step size is 0.02°.

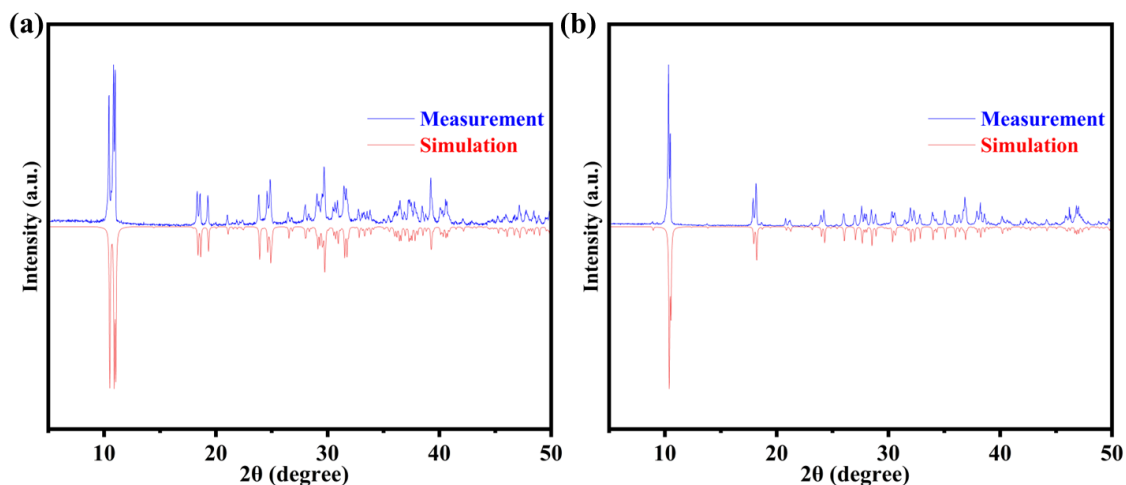

**Fig. S1** The measured and simulated PXRD patterns of compound 1 (a) and compound 2 (b).

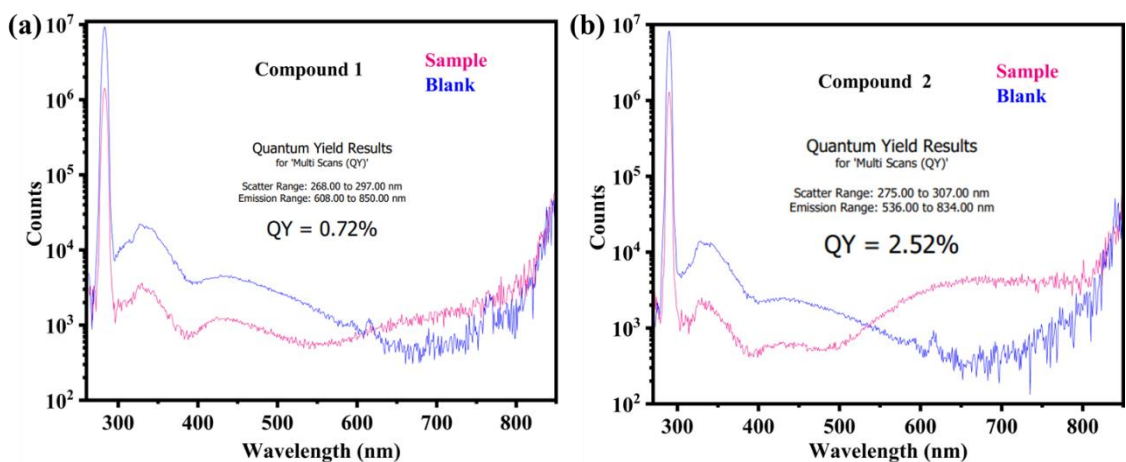

**Fig. S2** The photoluminescence quantum efficiency of two compounds at room temperature.

The calculation formula of spontaneous strain (Lagrangian linear strain tensor):

$$e_{11} = \frac{a_1 \sin \beta_1 \sin \gamma_1}{a_0 \sin \beta_0 \sin \gamma_0} - 1$$

$$e_{22} = \frac{b_1 \sin \alpha_1}{b_0 \sin \alpha_0} - 1$$

$$e_{33} = \frac{c_1}{c_0} - 1$$

$$e_{12} = e_{21} = \frac{1}{2} \left[ \frac{b_1 \sin \alpha_1 \cos \gamma_0}{b_0 \sin \alpha_0 \sin \gamma_0} - \frac{a_1 \sin \beta_1 \cos \gamma_1}{a_0 \sin \beta_0 \sin \gamma_0} \right]$$

$$e_{13} = e_{31} = \frac{1}{2} \left[ \frac{a_1 \cos \beta_1}{a_0 \sin \beta_0 \sin \gamma_0} + \frac{\cos \gamma_0}{\sin \gamma_0} \times \left( \frac{b_1 \cos \alpha_1}{b_0 \sin \alpha_0} - \frac{c_1 \cos \alpha_0}{c_0 \sin \alpha_0} \right) - \frac{c_1 \cos \beta_0}{c_0 \sin \beta_0 \sin \gamma_0} \right]$$

$$e_{23} = e_{32} = \frac{1}{2} \left[ \frac{b_1 \cos \alpha_1}{b_0 \sin \alpha_0} - \frac{c_1 \cos \alpha_0}{c_0 \sin \alpha_0} \right]$$

$a_1, b_1, c_1, \alpha_1, \beta_1, \gamma_1$  are the crystal data in the ferroelastic phase,  $a_0, b_0, c_0, \alpha_0, \beta_0, \gamma_0$  are the crystal data in the paraelastic phase.

For compound 1:

$$e_{11}=0.137, e_{12}=e_{21}=0.25, e_{13}=e_{31}=-0.01, e_{22}=0.211, e_{33}=-0.51, e_{23}=e_{32}=0$$

$$\beta_{ss} = \sqrt{0.137^2 + 2 \times 0.25^2 + 2 \times (-0.01)^2 + 0.211^2 + (-0.51)^2 + 0} = \sqrt{0.44859}=0.6698$$

For compound 2:

$$e_{11}=-0.116, e_{12}=e_{21}=0.255, e_{13}=e_{31}=0.0359, e_{22}=0.418, e_{33}=0.0016, e_{23}=e_{32}=0$$

$$\beta_{ss} = \sqrt{(-0.116)^2 + 2 \times 0.255^2 + 2 \times 0.0359^2 + 0.418^2 + 0.0016^2 + 0} = \sqrt{32081}=0.5656$$

The variation of bond lengths and bond angles of the inorganic frameworks of two compounds:

$$\Delta d = \frac{1}{6} \sum_{i=1}^6 [(d_i - d_0) / d_0]^2$$

$$\beta^2 = \frac{1}{11} \sum_{i=1}^{12} (\beta_i - 90^\circ)^2$$

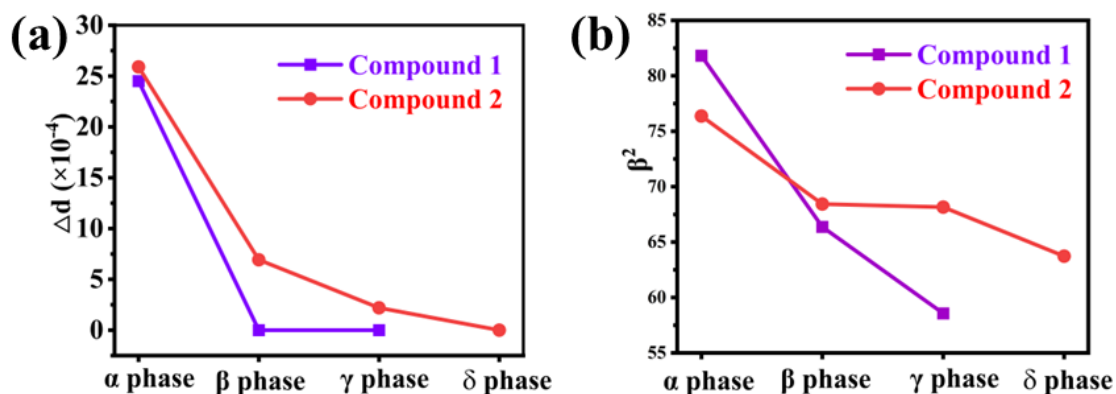

**Fig. S3** Bond length distortion (a) and bond angle variance (b) of two compounds calculated based on the crystal structures.

" $d_0$ " represents the average length of the Pb–Br bond, " $d_i$ " refers to the distance of each Pb–Br bond, and " $\beta_i$ " denotes the angle of each Br–Pb–Br bond. For compound 1 in the  $\alpha_1$  phase,  $\Delta d = 0.00245$  and  $\beta_2 = 81.8041$ , in the  $\beta_1$  phase,  $\Delta d = 0$  and  $\beta_2 = 66.3709$ , in the  $\gamma_1$  phase,  $\Delta d = 0$  and  $\beta_2 = 58.5654$ . While for compound 2, in the  $\alpha_2$  phase  $\Delta d = 0.00259$  and  $\beta_2 = 76.3666$ , in the  $\beta_2$  phase,  $\Delta d = 0.00069$  and  $\beta_2 = 68.4318$ , in the  $\gamma_2$  phase,  $\Delta d = 0.00022$  and  $\beta_2 = 68.1482$  in the  $\delta_2$  phase,  $\Delta d = 0$  and  $\beta_2 = 63.7259$ . It is not difficult to find that the inorganic framework changes of two compounds are both large from  $\alpha$  to  $\beta$  phase and weak in the subsequent phase transitions.

**Table S1.** Crystal data and structure refinement for compound 1 at 273 K, 300 K, 303 K, 333 K.

| Compound 1        | (DMP)PbBr <sub>3</sub>                             |                                                    |                                    |                                    |
|-------------------|----------------------------------------------------|----------------------------------------------------|------------------------------------|------------------------------------|
| Temperature       | 273 K                                              | 300 K                                              | 303 K                              | 333 K                              |
| Empirical formula | C <sub>6</sub> H <sub>12</sub> Br <sub>3</sub> NPb | C <sub>6</sub> H <sub>12</sub> Br <sub>3</sub> NPb | C <sub>6</sub> Br <sub>3</sub> NPb | C <sub>6</sub> Br <sub>3</sub> NPb |
| Formula weight    | 545.09                                             | 545.09                                             | 532.99                             | 532.99                             |
| Crystal system    | Monoclinic                                         | Monoclinic                                         | Hexagonal                          | Hexagonal                          |
| Space group       | <i>P2<sub>1</sub>/n</i>                            | <i>P2<sub>1</sub>/n</i>                            | <i>P6<sub>3</sub>/mmc</i>          | <i>P6<sub>3</sub>/mmc</i>          |

|                               |           |             |        |        |
|-------------------------------|-----------|-------------|--------|--------|
| $a/\text{\AA}$                | 9.657(4)  | 9.6477(10)  | 9.503  | 9.613  |
| $b/\text{\AA}$                | 7.966(3)  | 7.9361(7)   | 9.503  | 9.613  |
| $c/\text{\AA}$                | 16.008(7) | 16.0202(19) | 7.812  | 7.840  |
| $\alpha/^\circ$               | 90        | 90          | 90     | 90     |
| $\beta/^\circ$                | 92.539(9) | 92.416(9)   | 90     | 90     |
| $\gamma/^\circ$               | 90        | 90          | 120    | 120    |
| $V/\text{\AA}^3$              | 1230.3(9) | 1225.5(2)   | 611.0  | 627.4  |
| Z                             | 4         | 4           | 2      | 2      |
| GOF                           | 1.070     | 1.086       | 1.042  | 1.002  |
| F(000)                        | 968       | 968         | 460    | 460    |
| R1 [ $ I  \geq 2\sigma(I)$ ]  | 0.0892    | 0.0748      | 0.1735 | 0.0423 |
| wR2 [ $ I  \geq 2\sigma(I)$ ] | 0.1991    | 0.1932      | 0.3366 | 0.1103 |

**Table S2.** Crystal data and structure refinement for compound **2** at 273 K, 300 K, 373 K, 423 K.

| Compound <b>2</b>             | (EMP)PbBr <sub>3</sub>                             |                                                    |                                    |                                                      |
|-------------------------------|----------------------------------------------------|----------------------------------------------------|------------------------------------|------------------------------------------------------|
| Temperature                   | 273 K                                              | 300 K                                              | 373 K                              | 423 K                                                |
| Empirical formula             | C <sub>7</sub> H <sub>14</sub> Br <sub>3</sub> NPb | C <sub>7</sub> H <sub>14</sub> Br <sub>3</sub> NPb | C <sub>7</sub> Br <sub>3</sub> NPb | C <sub>7</sub> Br <sub>3</sub> NPb                   |
| Formula weight                | 559.11                                             | 545.09                                             | 545.00                             | 545.00                                               |
| Crystal system                | Monoclinic                                         | Monoclinic                                         | Monoclinic                         | Hexagonal                                            |
| Space group                   | <i>P</i> 2 <sub>1</sub> / <i>n</i>                 | <i>P</i> 2 <sub>1</sub> / <i>n</i>                 | <i>P</i> 2 <sub>1</sub> / <i>n</i> | <i>P</i> 6 <sub>3</sub> / <i>m</i> <i>m</i> <i>c</i> |
| $a/\text{\AA}$                | 9.761(2)                                           | 9.6477(10)                                         | 9.897(12)                          | 10.073                                               |
| $b/\text{\AA}$                | 7.9767(14)                                         | 7.9361(7)                                          | 17.309(19)                         | 10.073                                               |
| $c/\text{\AA}$                | 16.706(4)                                          | 16.0202(19)                                        | 7.897(8)                           | 7.910                                                |
| $\alpha/^\circ$               | 90                                                 | 90                                                 | 90                                 | 90                                                   |
| $\beta/^\circ$                | 92.053(6)                                          | 92.416(9)                                          | 94.10(2)                           | 90                                                   |
| $\gamma/^\circ$               | 90                                                 | 90                                                 | 90                                 | 120                                                  |
| $V/\text{\AA}^3$              | 1299.9(5)                                          | 1225.5(2)                                          | 1349(3)                            | 695.0                                                |
| Z                             | 4                                                  | 4                                                  | 4                                  | 2                                                    |
| GOF                           | 1.032                                              | 1.086                                              | 0.986                              | 0.952                                                |
| F(000)                        | 1000                                               | 968                                                | 944                                | 472                                                  |
| R1 [ $ I  \geq 2\sigma(I)$ ]  | 0.0388                                             | 0.0395                                             | 0.0715                             | 0.0457                                               |
| wR2 [ $ I  \geq 2\sigma(I)$ ] | 0.1165                                             | 0.0631                                             | 0.1789                             | 0.1164                                               |

**Table S3.** The bond lengths (Å) and angles (°) of compound **1** at 273 K

| Bond lengths [Å]      |          | Bond angles [°]                          |           |
|-----------------------|----------|------------------------------------------|-----------|
| Pb1–Br3               | 2.872(3) | Br3–Pb1–Br1 <sup>#1</sup>                | 83.64(9)  |
| Pb1–Br1               | 2.965(3) | Br3–Pb1–Br1                              | 92.57(9)  |
| Pb1–Br1 <sup>#1</sup> | 3.119(3) | Br3–Pb1–Br2                              | 92.48(10) |
| Pb1–Br2               | 2.938(3) | Br3–Pb1–Br2 <sup>#1</sup>                | 83.10(9)  |
| Pb1–Br2 <sup>#1</sup> | 3.177(3) | Br1–Pb1–Br1 <sup>#1</sup>                | 175.15(8) |
|                       |          | Br1 <sup>#1</sup> –Pb1–Br2 <sup>#1</sup> | 81.31(8)  |
|                       |          | Br1–Pb1–Br2 <sup>#1</sup>                | 95.25(9)  |
|                       |          | Br2–Pb1–Br1                              | 88.03(9)  |
|                       |          | Br2–Pb1–Br1 <sup>#1</sup>                | 95.15(9)  |

|                           |           |
|---------------------------|-----------|
| Br2–Pb1–Br2 <sup>#1</sup> | 174.59(8) |
| Pb1–Br3–Pb1 <sup>#1</sup> | 79.79(8)  |
| Pb1–Br1–Pb1 <sup>#2</sup> | 81.76(8)  |
| Pb1–Br2–Pb1 <sup>#2</sup> | 81.20(8)  |

Symmetry codes: #1 0.5-X, -0.5+Y, 0.5-Z; #2 0.5-X, 0.5+Y, 0.5-Z;

**Table S4.** The bond lengths (Å) and angles (°) of compound **1** at 300 K

| Bond lengths [Å]      |            | Bond angles [°]                          |           |
|-----------------------|------------|------------------------------------------|-----------|
| Pb1–Br1               | 2.8648(17) | Br1–Pb1–Br1 <sup>#1</sup>                | 168.78(5) |
| Pb1–Br1 <sup>#1</sup> | 3.3028(17) | Br1–Pb1–Br3                              | 92.48(5)  |
| Pb1–Br3 <sup>#2</sup> | 3.0982(19) | Br1–Pb1–Br3 <sup>#2</sup>                | 84.10(5)  |
| Pb1–Br3               | 2.9659(18) | Br1–Pb1–Br2 <sup>#2</sup>                | 83.04(5)  |
| Pb1–Br2               | 2.9264(19) | Br1–Pb1–Br2                              | 92.61(5)  |
| Pb1–Br2 <sup>#2</sup> | 3.1698(19) | Br3–Pb1–Br1 <sup>#1</sup>                | 79.05(5)  |
|                       |            | Br3 <sup>#2</sup> –Pb1–Br1 <sup>#1</sup> | 104.70(5) |
|                       |            | Br3–Pb1–Br3 <sup>#2</sup>                | 175.58(5) |
|                       |            | Br3–Pb1–Br2 <sup>#2</sup>                | 95.58(5)  |
|                       |            | Br3 <sup>#2</sup> –Pb1–Br2 <sup>#2</sup> | 81.25(5)  |
|                       |            | Br2–Pb1–Br1 <sup>#1</sup>                | 79.81(5)  |
|                       |            | Br2 <sup>#2</sup> –Pb1–Br1 <sup>#1</sup> | 104.93(5) |
|                       |            | Br2–Pb1–Br3 <sup>#2</sup>                | 95.24(6)  |
|                       |            | Br2–Pb1–Br3                              | 87.69(6)  |
|                       |            | Br2–Pb1–Br2 <sup>#2</sup>                | 174.66(5) |
|                       |            | Pb1–Br3–Pb1 <sup>#1</sup>                | 81.72(4)  |

Symmetry codes: #1 -0.5-X, 0.5+Y, 1.5-Z; #2 -0.5-X, -0.5+Y, 1.5-Z;

**Table S5.** The bond lengths (Å) and angles (°) of compound **1** at 303 K(cooling)

| Bond lengths [Å]      |          | Bond angles [°]                          |         |
|-----------------------|----------|------------------------------------------|---------|
| Pb1–Br1               | 3.000(8) | Br1–Pb1–Br1 <sup>#1</sup>                | 180.0   |
| Pb1–Br1 <sup>#1</sup> | 3.000(8) | Br1 <sup>#2</sup> –Pb1–Br1 <sup>#3</sup> | 97.8(2) |
| Pb1–Br1 <sup>#2</sup> | 3.000(8) | Br1 <sup>#2</sup> –Pb1–Br1 <sup>#4</sup> | 82.2(2) |
| Pb1–Br1 <sup>#3</sup> | 3.000(8) | Br1–Pb1–Br1 <sup>#2</sup>                | 82.2(2) |
| Pb1–Br1 <sup>#4</sup> | 3.000(8) | Br1–Pb1–Br1 <sup>#4</sup>                | 82.2(2) |
| Pb1–Br1 <sup>#5</sup> | 3.000(8) | Br1 <sup>#1</sup> –Pb1–Br1 <sup>#2</sup> | 97.8(2) |
|                       |          | Br1 <sup>#1</sup> –Pb1–Br1 <sup>#3</sup> | 82.2(2) |
|                       |          | Br1–Pb1–Br1 <sup>#5</sup>                | 97.8(2) |
|                       |          | Br1 <sup>#5</sup> –Pb1–Br1 <sup>#3</sup> | 82.2(2) |
|                       |          | Br1 <sup>#1</sup> –Pb1–Br1 <sup>#5</sup> | 82.2(2) |
|                       |          | Br1 <sup>#1</sup> –Pb1–Br1 <sup>#4</sup> | 97.8(2) |
|                       |          | Br1 <sup>#2</sup> –Pb1–Br1 <sup>#5</sup> | 180.0   |
|                       |          | Br1 <sup>#5</sup> –Pb1–Br1 <sup>#4</sup> | 97.8(2) |
|                       |          | Br1–Pb1–Br1 <sup>#3</sup>                | 97.8(2) |
|                       |          | Br1 <sup>#3</sup> –Pb1–Br1 <sup>#4</sup> | 180.0   |
|                       |          | Pb1–Br1–Pb1 <sup>#6</sup>                | 81.2(3) |

**Symmetry codes:** #1: -4-X, -2-Y, -Z; #2: -X+Y, -X, 0.5-Z; #3: -4+Y, -X+Y, -Z; #4: -Y, +X-Y, +Z; #5: +X-Y, +X, -0.5+Z; #6: +X-Y, +X, 0.5+Z; #7: 1-Y, +X-Y, +Z; #8: 1-X+Y, 1-X, +Z; #9: +X, +Y, 0.5-Z; #10: 1-Y, +X-Y, 0.5-Z; #11: 1-X+Y, 1-X, 0.5-Z; #12: +X, +X-Y, 0.5-Z; #13: 1-Y, 1-X, 0.5-Z; #14: 1-X+Y, +Y, +Z;

**Table S6.** The bond lengths (Å) and angles (°) of compound **1** at 333 K

| Bond lengths [Å]      |          | Bond angles [°]                          |          |
|-----------------------|----------|------------------------------------------|----------|
| Pb1–Br1 <sup>#1</sup> | 3.030(2) | Br1 <sup>#1</sup> –Pb1–Br1 <sup>#2</sup> | 180.0    |
| Pb1–Br1 <sup>#2</sup> | 3.030(2) | Br1–Pb1–Br1 <sup>#3</sup>                | 97.32(6) |
| Pb1–Br1 <sup>#3</sup> | 3.030(2) | Br1 <sup>#4</sup> –Pb1–Br1 <sup>#5</sup> | 97.32(6) |
| Pb1–Br1 <sup>#4</sup> | 3.030(2) | Br1 <sup>#1</sup> –Pb1–Br1               | 82.68(6) |
| Pb1–Br1               | 3.030(2) | Br1 <sup>#1</sup> –Pb1–Br1 <sup>#5</sup> | 82.68(6) |
| Pb1–Br1 <sup>#5</sup> | 3.030(2) | Br1 <sup>#2</sup> –Pb1–Br1               | 97.32(6) |
|                       |          | Br1 <sup>#2</sup> –Pb1–Br1 <sup>#3</sup> | 82.68(6) |
|                       |          | Br1 <sup>#1</sup> –Pb1–Br1 <sup>#4</sup> | 97.32(6) |
|                       |          | Br1 <sup>#4</sup> –Pb1–Br1 <sup>#3</sup> | 82.68(6) |
|                       |          | Br1 <sup>#2</sup> –Pb1–Br1 <sup>#4</sup> | 82.68(6) |
|                       |          | Br1 <sup>#2</sup> –Pb1–Br1 <sup>#5</sup> | 97.32(6) |
|                       |          | Br1–Pb1–Br1 <sup>#4</sup>                | 180.0    |
|                       |          | Br1 <sup>#3</sup> –Pb1–Br1 <sup>#5</sup> | 180.0    |
|                       |          | Br1 <sup>#1</sup> –Pb1–Br1 <sup>#3</sup> | 97.32(6) |
|                       |          | Br1–Pb1–Br1 <sup>#5</sup>                | 82.68(6) |
|                       |          | Pb1–Br1–Pb1 <sup>#6</sup>                | 80.60(8) |

**Symmetry codes:** #1: -X+Y, -X, 1.5-Z; #2: +X-Y, +X, 0.5+Z; #3: +Y, -X+Y, 2-Z; #4: -X, -Y, 2-Z; #5: -Y, +X-Y, +Z; #6: +X-Y, +X, -0.5+Z; #7: -Y, -1+X-Y, +Z; #8: 1-X+Y, -X, +Z; #9: +X, +Y, 1.5-Z; #10: 1-X+Y, -X, 1.5-Z;

**Table S7.** The bond lengths (Å) and angles (°) of compound **2** at 273 K

| Bond lengths [Å]      |            | Bond angles [°]                          |           |
|-----------------------|------------|------------------------------------------|-----------|
| Pb1–Br3               | 2.9014(12) | Br3–Pb1–Br3 <sup>#1</sup>                | 173.99(4) |
| Pb1–Br3 <sup>#1</sup> | 3.2062(13) | Br3–Pb1–Br1                              | 92.86(4)  |
| Pb1–Br1 <sup>#2</sup> | 3.1390(13) | Br3–Pb1–Br1 <sup>#2</sup>                | 84.20(4)  |
| Pb1–Br1               | 2.9593(13) | Br1–Pb1–Br3 <sup>#1</sup>                | 82.11(4)  |
| Pb1–Br2               | 2.8828(12) | Br1 <sup>#2</sup> –Pb1–Br3 <sup>#1</sup> | 101.03(3) |
|                       |            | Br1–Pb1–Br1 <sup>#2</sup>                | 175.19(4) |
|                       |            | Br2–Pb1–Br3                              | 93.30(4)  |
|                       |            | Br2–Pb1–Br3 <sup>#1</sup>                | 83.13(4)  |
|                       |            | Br2–Pb1–Br1 <sup>#2</sup>                | 97.66(4)  |
|                       |            | Br2–Pb1–Br1                              | 86.30(4)  |
|                       |            | Pb1–Br3–Pb1 <sup>#2</sup>                | 81.38(3)  |
|                       |            | Pb1–Br1–Pb1 <sup>#1</sup>                | 81.64(3)  |

**Symmetry codes:** #1: 0.5-X, -0.5+Y, 1.5-Z; #2: 0.5-X, 0.5+Y, 1.5-Z;

**Table S8.** The bond lengths (Å) and angles (°) of compound **2** at 300 K

| Bond lengths [Å] |           | Bond angles [°]           |           |
|------------------|-----------|---------------------------|-----------|
| Pb1–Br1          | 2.9165(7) | Br1–Pb1–Br1 <sup>#1</sup> | 171.83(2) |

|                       |           |                                          |             |
|-----------------------|-----------|------------------------------------------|-------------|
| Pb1–Br1 <sup>#1</sup> | 3.1803(7) | Br1–Pb1–Br2 <sup>#2</sup>                | 82.91(2)    |
| Pb1–Br2 <sup>#2</sup> | 3.0637(7) | Br1–Pb1–Br2                              | 92.58(2)    |
| Pb1–Br2               | 3.0239(7) | Br1–Pb1–Br3                              | 96.03(2)    |
| Pb1–Br3               | 3.0045(7) | Br1–Pb1–Br3 <sup>#2</sup>                | 85.45(2)    |
| Pb1–Br3 <sup>#2</sup> | 3.0803(7) | Br2–Pb1–Br1 <sup>#1</sup>                | 79.304(18)  |
|                       |           | Br2 <sup>#2</sup> –Pb1–Br1 <sup>#1</sup> | 98.966(19)  |
|                       |           | Br2–Pb1–Br2 <sup>#2</sup>                | 97.82(2)    |
|                       |           | Br2–Pb1–Br3 <sup>#2</sup>                | 177.992(19) |
|                       |           | Br2 <sup>#2</sup> –Pb1–Br3 <sup>#2</sup> | 81.594(19)  |
|                       |           | Br3 <sup>#2</sup> –Pb1–Br1 <sup>#1</sup> | 102.677(19) |
|                       |           | Br3–Pb1–Br1 <sup>#1</sup>                | 82.264(19)  |
|                       |           | Br3–Pb1–Br2                              | 83.51(2)    |
|                       |           | Br3–Pb1–Br2 <sup>#2</sup>                | 178.327(18) |
|                       |           | Br3–Pb1–Br3 <sup>#2</sup>                | 97.05(2)    |
|                       |           | Pb1–Br1–Pb1 <sup>#2</sup>                | 80.631(17)  |
|                       |           | Pb1–Br2–Pb1 <sup>#1</sup>                | 80.900(17)  |
|                       |           | Pb1–Br3–Pb1 <sup>#1</sup>                | 80.938(17)  |

Symmetry codes: #1: +X, -0.5-Y, -0.5+Z; #2: +X, -0.5-Y, 0.5+Z;

**Table S9.** The bond lengths (Å) and angles (°) of compound **2** at 373 K

| Bond lengths [Å]      |          | Bond angles [°]                          |           |
|-----------------------|----------|------------------------------------------|-----------|
| Pb1–Br3               | 2.956(4) | Br3–Pb1–Br3 <sup>#1</sup>                | 176.34(9) |
| Pb1–Br3 <sup>#1</sup> | 3.110(4) | Br3–Pb1–Br1                              | 96.37(11) |
| Pb1–Br1               | 3.025(4) | Br3–Pb1–Br1 <sup>#2</sup>                | 82.66(10) |
| Pb1–Br1 <sup>#2</sup> | 3.041(4) | Br3–Pb1–Br2 <sup>#2</sup>                | 83.80(11) |
| Pb1–Br2               | 3.033(4) | Br3–Pb1–Br2                              | 96.77(11) |
| Pb1–Br2 <sup>#2</sup> | 3.025(3) | Br1–Pb1–Br3 <sup>#1</sup>                | 80.42(10) |
|                       |          | Br1 <sup>#2</sup> –Pb1–Br3 <sup>#1</sup> | 99.43(10) |
|                       |          | Br1–Pb1–Br1 <sup>#2</sup>                | 97.00(13) |
|                       |          | Br1–Pb1–Br2                              | 82.62(12) |
|                       |          | Br2–Pb1–Br3 <sup>#1</sup>                | 81.11(10) |
|                       |          | Br2 <sup>#2</sup> –Pb1–Br3 <sup>#1</sup> | 99.43(10) |
|                       |          | Br2 <sup>#2</sup> –Pb1–Br1               | 179.45(9) |
|                       |          | Br2 <sup>#2</sup> –Pb1–Br1 <sup>#2</sup> | 82.49(12) |
|                       |          | Br2–Pb1–Br1 <sup>#2</sup>                | 179.29(9) |
|                       |          | Br2 <sup>#2</sup> –Pb1–Br2               | 97.89(13) |
|                       |          | Pb1–Br3–Pb1 <sup>#2</sup>                | 81.17(11) |
|                       |          | Pb1–Br1–Pb1 <sup>#1</sup>                | 81.23(10) |
|                       |          | Pb1 <sup>#1</sup> –Br2–Pb1               | 81.35(10) |

Symmetry codes: #1: +X, 0.5-Y, -0.5+Z; #2: +X, 0.5-Y, 0.5+Z;

**Table S10.** The bond lengths (Å) and angles (°) of compound **2** at 423 K

| Bond lengths [Å]      |          | Bond angles [°]                          |          |
|-----------------------|----------|------------------------------------------|----------|
| Pb1–Br1 <sup>#1</sup> | 3.044(3) | Br1 <sup>#1</sup> –Pb1–Br1 <sup>#2</sup> | 82.35(7) |

|                       |          |                                          |          |
|-----------------------|----------|------------------------------------------|----------|
| Pb1–Br1 <sup>#2</sup> | 3.044(3) | Br1 <sup>#3</sup> –Pb1–Br1 <sup>#4</sup> | 97.65(7) |
| Pb1–Br1 <sup>#3</sup> | 3.044(3) | Br1 <sup>#3</sup> –Pb1–Br1               | 82.35(7) |
| Pb1–Br1 <sup>#4</sup> | 3.044(3) | Br1 <sup>#1</sup> –Pb1–Br1 <sup>#3</sup> | 97.65(7) |
| Pb1–Br1 <sup>#5</sup> | 3.044(3) | Br1 <sup>#1</sup> –Pb1–Br1               | 180.0    |
| Pb1–Br1               | 3.044(3) | Br1 <sup>#2</sup> –Pb1–Br1 <sup>#3</sup> | 180.0    |
|                       |          | Br1 <sup>#2</sup> –Pb1–Br1 <sup>#4</sup> | 82.35(7) |
|                       |          | Br1 <sup>#1</sup> –Pb1–Br1 <sup>#5</sup> | 97.65(7) |
|                       |          | Br1 <sup>#5</sup> –Pb1–Br1 <sup>#4</sup> | 180.0    |
|                       |          | Br1 <sup>#2</sup> –Pb1–Br1 <sup>#5</sup> | 97.65(7) |
|                       |          | Br1 <sup>#2</sup> –Pb1–Br1               | 97.65(7) |
|                       |          | Br1 <sup>#3</sup> –Pb1–Br1 <sup>#5</sup> | 82.35(7) |
|                       |          | Br1 <sup>#5</sup> –Pb1–Br1               | 82.35(7) |
|                       |          | Br1 <sup>#1</sup> –Pb1–Br1 <sup>#4</sup> | 82.35(7) |
|                       |          | Br1 <sup>#4</sup> –Pb1–Br1               | 97.65(7) |
|                       |          | Pb1–Br1–Pb1 <sup>#6</sup>                | 81.04(9) |

**Symmetry codes:** #1: 2-X, 2-Y, 1-Z; #2: 1+X-Y, +X, 1-Z; #3: 1-X+Y, 2-X, +Z; #4: +Y, 1-X+Y, 1-Z; #5: 2-Y, 1+X-Y, +Z; #6: 2-X, 2-Y, -0.5+Z; #7: +X, +Y, 0.5-Z; #8: 2-X+Y, 2-X, 0.5-Z; #9: 2-X+Y, 2-X, +Z; #10: 2-Y, +X-Y, 0.5-Z; #11: 2-Y, +X-Y, +Z;
